# Supplementary material for: Deletion of lysophosphatidylcholine acyltransferase 3 in myeloid cells worsens hepatic steatosis after a high-fat diet
Source: PubMed Central journal article supplement (PMC7859853; doi:10.1194/jlr.ra120000737), 2020-12-17
Supplement: mmc1.pdf [file mmc1.pdf]

| Molecular species | logfold  | fold    | WT1      | WT2      | WT3      | WT4      | Lpcat3 KOMAC1 | Lpcat3 KOMAC2 | Lpcat3 KOMAC3 | Lpcat3 KOMAC4 | Molecular species | logfold  | fold    | WT1      | WT2      | WT3      | WT4      | Lpcat3 KOMAC1 | Lpcat3 KOMAC2 | Lpcat3 KOMAC3 | Lpcat3 KOMAC4 |
|-------------------|----------|---------|----------|----------|----------|----------|---------------|---------------|---------------|---------------|-------------------|----------|---------|----------|----------|----------|----------|---------------|---------------|---------------|---------------|
| 342 PI            | -0.24504 | 0.84379 | 0.27922  | 0.18497  | 0.30126  | 0.20446  | 0.18911       | 0.21163       | 0.27204       | 0.18862       | p18:0/20:3 pPE    | -0.61030 | 0.65506 | 0.48828  | 0.43331  | 0.59663  | 0.56792  | 0.38743       | 0.39071       | 0.33976       | 0.24855       |
| 341 PI            | -0.24073 | 0.84632 | 0.27920  | 0.49306  | 0.80994  | 0.60144  | 0.66134       | 0.50544       | 0.52904       | 0.55269       | p18:1/18:2 pPE    | -0.08814 | 1.06005 | 0.11125  | 0.10199  | 0.13021  | 0.11655  | 0.11913       | 0.13171       | 0.13274       | 0.10860       |
| 340 PI            | -0.25926 | 0.83552 | 0.11902  | 0.13681  | 0.21822  | 0.24934  | 0.10866       | 0.16752       | 0.20824       | 0.12000       | p18:1/18:1 pPE    | -0.08713 | 0.94140 | 0.47563  | 0.54031  | 0.76663  | 0.74584  | 0.59436       | 0.71952       | 0.63846       | 0.52202       |
| 364 PI            | -0.05334 | 1.03766 | 2.4237   | 2.26234  | 1.87350  | 1.95770  | 2.49605       | 1.96674       | 1.87877       | 2.50566       | p18:0/18:2 pPE    | -0.18386 | 0.88035 | 0.15288  | 0.14996  | 0.18777  | 0.22059  | 0.13382       | 0.18316       | 0.16153       | 0.14759       |
| 363 PI            | -0.03712 | 0.97460 | 0.61595  | 0.49557  | 0.51369  | 0.53412  | 0.52133       | 0.49884       | 0.55585       | 0.52845       | p18:1/18:0 pPE    | -0.32234 | 0.79022 | 0.01755  | 0.01831  | 0.01441  | 0.01523  | 0.01423       | 0.01240       | 0.01495       | 0.01076       |
| 362 PI            | -0.26343 | 0.83311 | 3.75220  | 2.89442  | 4.41248  | 3.20365  | 3.01667       | 2.76129       | 3.20685       | 2.89760       | p18:0/18:1 pPE    | -0.29675 | 0.81999 | 0.59225  | 0.60839  | 0.86169  | 0.84558  | 0.51945       | 0.69094       | 0.65073       | 0.50608       |
| 361 PI            | -0.20853 | 0.86542 | 1.39687  | 1.17933  | 1.98602  | 1.57498  | 1.39458       | 1.38545       | 1.55387       | 0.97736       | 352 PE            | 0.33668  | 1.26285 | 0.26800  | 0.22604  | 0.22255  | 0.17592  | 0.29543       | 0.28359       | 0.25704       | 0.29103       |
| 360 PI            | 0.07013  | 1.05023 | 0.40432  | 0.03943  | 0.03969  | 0.05050  | 0.02762       | 0.04015       | 0.03173       | 0.06989       | p18:0/20:0 pPE    | -0.08384 | 0.57104 | 0.00727  | 0.00712  | 0.01139  | 0.01407  | 0.00546       | 0.00757       | 0.00731       | 0.00243       |
| 385 PI            | 0.27518  | 1.21015 | 6.95166  | 6.20464  | 6.75987  | 6.32189  | 8.21630       | 7.65013       | 7.22587       | 8.15945       | p18:0/18:0 pPE    | -0.38918 | 0.77422 | 0.02476  | 0.01962  | 0.02703  | 0.03071  | 0.01692       | 0.01952       | 0.01288       | 0.01984       |
| 384 PI            | 0.02512  | 1.01756 | 68.65970 | 71.47577 | 67.69715 | 70.70192 | 71.72045      | 70.25511      | 69.69983      | 71.31569      | 351 PE            | 0.19448  | 1.14431 | 0.73018  | 0.69081  | 0.67653  | 0.63207  | 0.75983       | 0.73490       | 0.78814       | 0.80662       |
| 407 PI            | 0.26433  | 1.20108 | 0.19495  | 0.19294  | 0.25657  | 0.28691  | 0.32307       | 0.29523       | 0.30599       | 0.19442       | 364 PE            | -0.07755 | 0.95096 | 2.25679  | 2.26267  | 2.14248  | 2.24078  | 1.51793       | 2.25132       | 1.88247       | 1.98418       |
| 406 PI            | -0.27132 | 0.82856 | 1.78002  | 1.49211  | 1.54078  | 1.56295  | 1.84747       | 1.29094       | 1.29094       | 1.31601       | 363 PE            | 0.09692  | 1.06949 | 0.99004  | 0.86764  | 0.90130  | 0.80592  | 0.89166       | 1.01993       | 0.95229       | 0.94873       |
| 405 PI            | -0.32037 | 0.80086 | 10.74637 | 10.17437 | 11.33414 | 10.50482 | 6.71556       | 10.10742      | 9.78308       | 8.09870       | 362 PE            | 0.22116  | 1.16567 | 0.59588  | 0.52475  | 0.60042  | 0.51823  | 0.62127       | 6.77933       | 6.57334       | 6.42184       |
| 404 PI            | 0.38706  | 1.30773 | 2.30461  | 2.19862  | 2.18468  | 2.45554  | 3.22426       | 2.86422       | 2.95455       | 2.63949       | 361 PE            | 0.10837  | 1.07801 | 0.91991  | 0.93146  | 0.92970  | 0.94805  | 0.94678       | 9.70159       | 10.68593      | 10.19461      |
| C12:0             | -0.28841 | 0.81881 | 1.57729  | 1.35149  | 1.17403  | 1.27944  | 1.06408       | 0.67083       | 1.46300       | 1.26843       | p18:1/20:6 pPE    | -0.22295 | 0.85681 | 3.17803  | 3.04286  | 3.27508  | 3.05951  | 2.78195       | 2.74883       | 2.70558       | 2.52130       |
| C14:0             | 0.20467  | 1.01725 | 1.75980  | 1.78789  | 1.55087  | 1.75647  | 1.93017       | 1.71772       | 1.64197       | 1.68340       | p18:1/20:5 pPE    | -1.56795 | 0.33729 | 0.16908  | 0.15048  | 0.28015  | 0.22440  | 0.06630       | 0.09510       | 0.07135       | 0.04521       |
| C15:0             | -0.20746 | 0.86594 | 0.45815  | 0.51157  | 0.39809  | 0.53341  | 0.50651       | 0.39631       | 0.39631       | 0.35412       | p18:0/22:5 pPE    | 0.00601  | 1.00418 | 0.28433  | 0.27016  | 0.26851  | 0.24201  | 0.28044       | 0.26169       | 0.26659       | 0.26403       |
| C16:1 n-9         | -0.26738 | 0.83083 | 0.48593  | 1.06577  | 0.36583  | 0.47335  | 0.59632       | 0.40899       | 0.42684       | 0.50427       | p18:1/20:4 pPE    | -0.53249 | 0.69136 | 0.32437  | 0.40865  | 0.37887  | 0.41526  | 0.26515       | 0.26215       | 0.24981       | 0.24026       |
| C16:1 n-7         | 0.46131  | 1.37679 | 0.23282  | 0.20624  | 0.20292  | 0.17632  | 0.24731       | 0.25872       | 0.15614       | 0.15120       | p18:0/20:0 pPE    | -1.85930 | 0.27561 | 0.19431  | 0.17921  | 0.20207  | 0.23559  | 0.66472       | 0.07776       | 0.05811       | 0.05020       |
| C16:0             | -0.24122 | 0.99143 | 48.24271 | 47.75893 | 48.27577 | 49.74666 | 48.54599      | 49.26135      | 49.59007      | 47.64523      | p18:0/22:4 pPE    | 0.81442  | 1.75859 | 1.23177  | 1.29466  | 1.08442  | 1.12952  | 1.26609       | 1.99266       | 2.04545       | 2.13244       |
| C17:0             | 0.08666  | 1.06191 | 0.44322  | 0.40816  | 0.39294  | 0.40359  | 0.52022       | 0.42912       | 0.45173       | 0.42747       | p18:1/20:0 pPE    | 0.54476  | 1.45878 | 0.71643  | 0.79179  | 0.74751  | 0.74897  | 0.96429       | 1.08478       | 1.16436       | 1.16976       |
| C18:1 n-9         | 0.05084  | 1.03587 | 2.44874  | 2.93555  | 2.90598  | 3.23240  | 2.85830       | 2.47858       | 2.01891       | 3.21117       | p18:0/20:4 pPE    | -0.81108 | 0.56996 | 3.82918  | 4.26820  | 3.97765  | 4.70928  | 2.48654       | 2.54622       | 2.42121       | 2.31228       |
| C18:1 n-7         | 0.08954  | 1.00239 | 1.11803  | 1.05966  | 1.15186  | 1.09256  | 1.31443       | 1.21721       | 0.93066       | 1.28166       | p18:0/22:3 pPE    | -0.07394 | 0.94640 | 0.19533  | 0.24138  | 0.32277  | 0.24700  | 0.19759       | 0.22223       | 0.24159       | 0.20155       |
| C18:0             | -0.01938 | 0.98566 | 39.24501 | 37.24411 | 37.47420 | 37.29541 | 37.91644      | 37.28071      | 38.32450      | 35.64347      | p18:1/20:2 pPE    | -0.28859 | 0.83013 | 0.05812  | 0.05264  | 0.07871  | 0.07059  | 0.04682       | 0.06862       | 0.05244       | 0.04801       |
| C18:2 n-6         | -0.18153 | 0.95163 | 0.95053  | 1.15073  | 0.78276  | 0.64995  | 0.87007       | 0.79057       | 0.77913       | 0.92324       | p18:0/20:3 pPE    | -0.46369 | 0.72513 | 0.36558  | 0.38100  | 0.45425  | 0.48612  | 0.28747       | 0.34156       | 0.31750       | 0.27671       |
| C18:3 n-6         | 0.07560  | 1.81629 | 0.01023  | 0.01013  | 0.00824  | 0.00816  | 0.01242       | 0.00913       | 0.00930       | 0.03917       | p18:0/22:2 pPE    | -0.30452 | 0.80971 | 0.03037  | 0.03555  | 0.04343  | 0.04191  | 0.02311       | 0.03330       | 0.03876       | 0.02531       |
| C18:3 n-3         | -0.54769 | 0.68411 | 0.00913  | 0.01470  | 0.00568  | 0.00379  | 0.00596       | 0.00515       | 0.00496       | 0.00671       | p18:1/20:1 pPE    | -0.47397 | 0.71998 | 0.05221  | 0.05008  | 0.06860  | 0.08497  | 0.03919       | 0.06690       | 0.05332       | 0.03792       |
| C19:0             | -0.02841 | 0.83863 | 0.66321  | 0.61004  | 0.05911  | 0.06661  | 0.07504       | 0.06103       | 0.06277       | 0.06079       | p18:0/22:5 pPE    | -0.47397 | 0.71998 | 0.05221  | 0.05008  | 0.06860  | 0.08497  | 0.03919       | 0.06690       | 0.05332       | 0.03792       |
| C20:0             | -0.13327 | 0.91176 | 0.43542  | 0.37378  | 0.37233  | 0.38000  | 0.36625       | 0.34813       | 0.38094       | 0.32759       | p18:0/22:1 pPE    | -0.72695 | 0.60418 | 0.03609  | 0.04336  | 0.05687  | 0.06096  | 0.02739       | 0.03663       | 0.03533       | 0.01985       |
| C20:1 n-9         | 0.17436  | 1.12847 | 0.05276  | 0.09677  | 0.14677  | 0.11631  | 0.12440       | 0.11515       | 0.10911       | 0.11495       | p18:1/20:0 pPE    | -0.54664 | 0.68461 | 0.00650  | 0.01068  | 0.01312  | 0.01137  | 0.00760       | 0.00869       | 0.00654       | 0.00563       |
| C20:1 n-6         | 0.56513  | 1.23469 | 0.07568  | 0.06654  | 0.14822  | 0.07779  | 0.12405       | 0.10331       | 0.06957       | 0.20708       | p18:0/20:1 pPE    | -0.66210 | 0.63196 | 0.04718  | 0.04933  | 0.08310  | 0.08687  | 0.03582       | 0.05427       | 0.05273       | 0.02559       |
| C20:1 n-3         | 0.30045  | 1.47942 | 0.06494  | 0.09654  | 0.17615  | 0.08717  | 0.14718       | 0.11242       | 0.06973       | 0.28413       | 386 PE            | 0.17273  | 1.09220 | 1.79623  | 1.72729  | 1.66775  | 1.35350  | 1.84662       | 1.89141       | 1.67407       | 1.73705       |
| C20:1 n-0         | 0.48904  | 1.40352 | 0.75022  | 1.19726  | 1.39533  | 1.17490  | 1.74235       | 1.52149       | 1.07252       | 2.02827       | 385 PE            | -0.04218 | 0.97118 | 0.97118  | 3.71989  | 3.67964  | 3.80647  | 3.58223       | 3.65837       | 3.81790       | 3.46880       |
| C20:1 n-3         | 1.22408  | 1.33606 | 0.05824  | 0.08117  | 0.12818  | 0.06902  | 0.08428       | 0.10331       | 0.04170       | 0.52707       | 384 PE            | -0.18368 | 0.88945 | 13.58354 | 14.38228 | 12.74229 | 14.15310 | 12.61210      | 11.96986      | 11.77665      | 12.40255      |
| C21:0             | -0.14672 | 0.90330 | 0.01397  | 0.01417  | 0.01076  | 0.01550  | 0.01266       | 0.01087       | 0.01236       | 0.01325       | 383 PE            | 0.18159  | 1.82247 | 1.74140  | 1.59772  | 1.60427  | 1.27865  | 1.55892       | 1.32214       | 1.35795       | 1.32214       |
| C22:0             | 0.13363  | 1.09721 | 0.02987  | 0.03009  | 0.02793  | 0.03230  | 0.03745       | 0.02793       | 0.02582       | 0.04066       | 382 PE            | -0.20365 | 0.86835 | 0.65270  | 0.64585  | 0.85738  | 0.85021  | 0.62159       | 0.67460       | 0.72633       | 0.58787       |
| C22:1 n-9         | -0.42261 | 0.74608 | 0.04141  | 0.02027  | 0.06630  | 0.04820  | 0.02536       | 0.01935       | 0.04241       | 0.04367       | 381 PE            | -0.30857 | 0.80744 | 0.18497  | 0.20185  | 0.21052  | 0.21478  | 0.13922       | 0.17571       | 0.18124       | 0.15230       |
| C22:1 n-7         | 0.42347  | 1.34115 | 0.00382  | 0.00447  | 0.01041  | 0.00607  | 0.00953       | 0.00762       | 0.00543       | 0.01063       | p18:1/22:5 pPE    | 0.06254  | 1.04340 | 1.07607  | 1.00583  | 0.97549  | 0.89164  | 1.05932       | 0.98578       | 0.98979       | 1.04638       |
| C22:4 n-6         | 0.24623  | 1.18619 | 0.41757  | 0.30068  | 1.01404  | 0.83354  | 1.30452       | 0.86006       | 0.79846       | 0.55855       | p18:0/22:4 pPE    | -0.44622 | 0.73396 | 1.36149  | 1.30535  | 1.29981  | 1.29616  | 1.30060       | 0.90167       | 0.90674       | 0.90631       |
| C22:5 n-6         | 0.25020  | 1.18937 | 0.01838  | 0.03962  | 0.02861  | 0.04551  | 0.03938       | 0.04470       | 0.03662       | 0.03645       | p18:1/22:4 pPE    | 1.00800  | 2.00111 | 0.50593  | 0.59411  | 0.44911  | 0.44467  | 0.97199       | 0.87475       | 1.01300       | 1.12291       |
| C22:5 n-3         | 0.26433  | 1.20108 | 0.43531  | 0.71918  | 0.87352  | 0.57595  | 0.92452       | 0.81126       | 0.53860       | 0.85799       | p18:0/22:5 pPE    | -0.21892 | 0.85921 | 1.34528  | 1.48015  | 1.25366  | 1.24084  | 1.01615       | 1.04723       | 1.14300       | 1.20802       |
| C22:6 n-3         | 0.33781  | 1.26384 | 0.42395  | 0.69316  | 0.81159  | 0.53913  | 0.82626       | 0.72367       | 0.47185       | 1.06077       | p18:0/24:4 pPE    | 0.30684  | 1.23699 | 0.09529  | 0.09151  | 0.07375  | 0.07455  | 0.09815       | 0.09166       | 0.10578       | 0.11884       |
| C24:5             | 0.11738  | 1.08508 | 0.00677  | 0.01097  | 0.01105  | 0.01040  | 0.01215       | 0.00991       | 0.00910       | 0.01135       | p18:1/22:3 pPE    | 0.62088  | 1.53781 | 0.20127  | 0.24201  | 0.19194  | 0.19196  | 0.27569       | 0.28560       | 0.53661       | 0.35714       |
| C24:6 n-3         | -0.06139 | 0.95834 | 0.00923  | 0.01262  | 0.01544  | 0.00893  | 0.01002       | 0.01043       | 0.00796       | 0.01587       | p18:0/22:4 pPE    | 0.65255  | 1.57194 | 0.48219  | 0.53414  | 0.37149  | 0.41362  | 0.70071       | 0.60118       | 0.71432       | 0.81556       |
| C24:4             | 0.68885  | 1.61200 | 0.00650  | 0.01317  | 0.01233  | 0.01690  | 0.02382       | 0.02516       | 0.02328       | 0.00656       | p18:0/24:4 pPE    | -0.11222 | 0.92516 | 0.00858  | 0.01637  | 0.01191  | 0.02091  | 0.00149       | 0             |               |               |

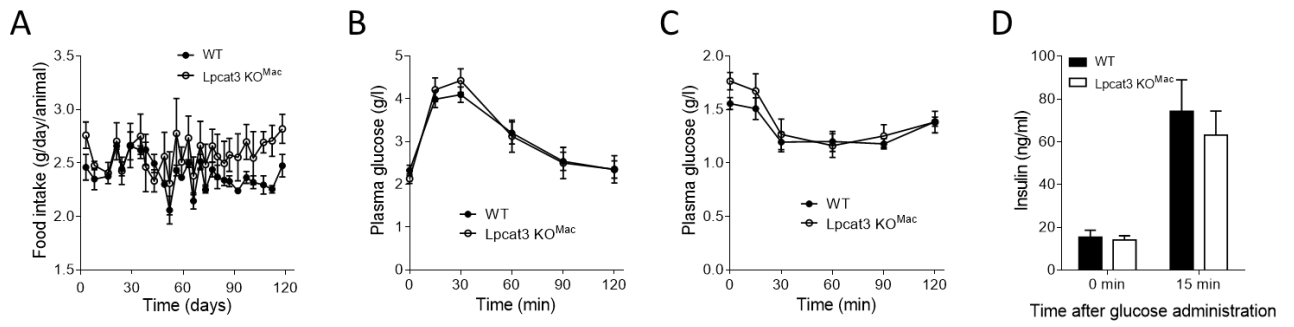

**Supplemental Figure 2 : Metabolic parameters in *Lpcat3KO<sup>Mac</sup>* mice fed a HFD for 16 Weeks (A)** Food intake during 16 weeks of HFD. (B and C) Oral glucose tolerance test (B) and insulin tolerance test (C) of 6 hours fasting WT and *Lpcat3KO<sup>Mac</sup>* mice (D) Insulin secretion after oral glucose administration. (n=7vs13) Data are expressed as mean +/- SEM.

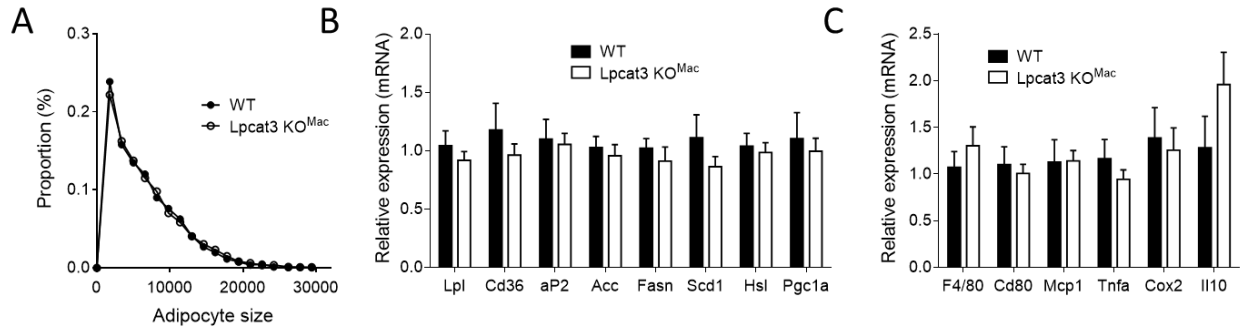

**Supplemental Figure 3 : Analysis of adipose tissue from *Lpcat3KO<sup>Mac</sup>* mice after 16 weeks of HFD.** (A) Adipocyte size using adipose tissue histological sections. (B and C) mRNA levels of genes involved in adipocyte metabolism (B) and adipose tissue inflammation (C). n=7vs13, Data are expressed as mean + SEM.
